# Supplementary material for: Distribution Characteristics and Genesis of Marine Anoxic Conditions in the Southwest of the Upper Yangtze Basin During the Late Ordovician–Early Silurian, South China
Source: Frontiers journal article supplement (doi:10.3389/feart.2022.934488), 2022-07-04
Supplement: Table_1.XLSX [file Table_1.XLSX]

## Sheet: Sheet1
Stage	Formation	Samples	G. zone	Depth	TOC (wt, %)	LSR m/Myr	OCAR mg/cm2/kyr	CIAcoor	TS (%)	Fe/Mn	TS/TOC	FeT (%)	FeU (%)	FeHR (%)	Fepy (%)	FeHR/FeT	Fepy/FeHR
Tianlin section			27°55'15"N, 105°36'45"E
Rhuddanian	Longmaxi Formation	TL-23	A.asc.	12.1	7.17	1.79	32.1	76	1.15	57.7	0.16	3.58	0.68	2.9	1.71	0.81	0.59
		TL-22		11.85	4.91	1.79	22	74	2.16	64.3	0.44	3.49	0.84	2.65	1.75	0.76	0.66
		TL-21		11.33	4.56	1.79	20.4	80	1.92	57.7	0.42	2.23	0.98	1.25	0.84	0.56	0.67
Hirnantian		TL-20	M.per.	10.88	3.11	1.47	11.4	79	1.59	60	0.51	3.26	0.52	2.74	1.86	0.84	0.68
		TL-19		10.45	3.24	1.47	11.9	74	1.43	67.3	0.44	2.09	0.54	1.55	0.88	0.74	0.57
	Guanyinqiao Formation	TL-18	H.F	10.36	0.68	5.55	9.4	61	1.14	229.5	0.74	1.78	1.17	0.61	0.19	0.34	0.31
		TL-17		10.25	0.47	5.55	6.5	59	0.04	187.1	0.03	1.45	1.17	0.28	0.12	0.19	0.45
		TL-16		10.1	0.59	5.55	8.2	67	0.03	128.8	0.05	2	1.58	0.42	0.23	0.21	0.55
	Wufeng Formation	TL-15	M.ext.	9.94	2.15	5.55	29.8	73	0.71	76.4	0.33	2.37	1.49	0.88	0.53	0.37	0.61
		TL-14		9.28	2.08	5.55	28.9	72	1.02	96.7	0.33	2.25	0.7	1.55	0.88	0.69	0.57
		TL-13		8.95	2.31	5.55	32.1	71	0.81	88.1	0.35	1.37	0.62	0.75	0.47	0.55	0.63
		TL-12		7.54	3.66	5.55	50.8	73	1.5	90.8	0.41	1.41	0.51	0.9	0.51	0.64	0.56
		TL-11		6.4	4.99	5.55	69.2	70	1.55	95.3	0.31	1.48	0.43	1.05	0.7	0.71	0.67
late Katian		TL-10	P.pac.	5.88	3.78	1.67	15.8	75	1.4	95.8	0.37	1.48	0.46	1.02	0.56	0.69	0.55
		TL-09		5.32	3.71	1.67	15.5	73	1.89	97	0.51	2.25	0.72	1.53	0.63	0.68	0.41
		TL-08		4.83	3.05	1.67	12.7	71	1.37	103.5	0.45	1.6	0.66	0.94	0.62	0.59	0.66
		TL-07		4.05	3.68	1.67	15.4	77	1.69	101.2	0.46	1.57	0.53	1.04	0.66	0.66	0.64
		TL-06		3.3	2.53	1.67	10.6	76	1.14	92.5	0.45	2.15	0.95	1.2	0.59	0.56	0.49
		TL-05	D.com.	2.45	2.39	5.5	32.9	77	1.15	106.4	0.48	3.3	1.62	1.68	1.11	0.51	0.66
		TL-04		1.9	2.11	5.5	29	76	1.16	113.6	0.55	2.64	1.61	1.03	0.6	0.39	0.58
		TL-03		1.35	3.27	5.5	45	75	1.9	117.2	0.58	2.72	0.98	1.74	1.17	0.64	0.67
		TL-02		0.84	0.79	5.5	10.9	70	0.26	97.1	0.33	1.51	1.04	0.47	0.25	0.31	0.54
		TL-01		0.3	1.24	5.5	17.1	79	0.69	137.1	0.56	3.19	2.11	1.08	0.47	0.34	0.43
Changhebian section				28°44'33"N, 103°26'23"E
Rhuddanian	Longmaxi Formation	CH-13	A.asc.	3.98	3.59	2.23	20	72	1.24	79.7	0.35	2.47	0.84	1.63	0.91	0.66	0.56
		CH-12		3.52	2.86	2.23	15.9	74	1.11	71.4	0.39	1.66	0.48	1.18	0.79	0.71	0.67
		CH-11		3.02	5.42	2.23	30.2	76	1.04	83.8	0.19	2.6	0.81	1.79	1	0.69	0.56
Hirnantian		CH-10	M.per.	2.55	6.11	2.38	36.4	76	0.98	97	0.16	4.51	1.04	3.47	2.29	0.77	0.66
		CH-09		1.91	4.35	2.38	25.9	75	0.89	95.3	0.2	4.43	1.46	2.97	1.99	0.67	0.67
		CH-08		1.73	3.58	2.38	21.3	77	0.79	103.6	0.22	2.41	1.33	1.08	0.61	0.45	0.56
		CH-07		1.59	4.01	2.38	23.9	70	0.37	208.3	0.09	3.23	2.1	1.13	0.62	0.35	0.55
	Wufeng Formation	CH-06	M.ext.	1.37	3.27	0.52	4.3	68	0.31	130.4	0.09	3.03	1.91	1.12	0.48	0.37	0.43
		CH-05		1.21	3.11	0.52	4	77	0.41	95.3	0.13	1.48	0.83	0.65	0.37	0.44	0.57
late Katian		CH-04	P.pac.	1.05	2.17	0.35	1.9	74	1.55	97	0.71	2.25	0.88	1.37	0.86	0.61	0.63
		CH-03		0.83	1.24	0.35	1.1	73	0.45	96.7	0.36	2.25	0.81	1.44	0.92	0.64	0.64
		CH-02		0.55	2.03	0.35	1.8	73	0.33	155.4	0.16	2.41	1.08	1.33	0.81	0.55	0.61
		CH-01	D.com.	0.3	1.34	0.92	3.1	75	0.12	130.1	0.09	2.02	1.6	0.42	0.23	0.21	0.55
